# Supplementary material for: Self-assembled 2,4-dichlorophenol hydroxylase-inorganic hybrid nanoflowers with enhanced activity and stability
Source: Royal Society of Chemistry journal article supplement (doi:10.1039/c8ra02360c), 2018-01-01
Supplement: c8ra02360c1.pdf [file c8ra02360c1.pdf]

### Supporting information

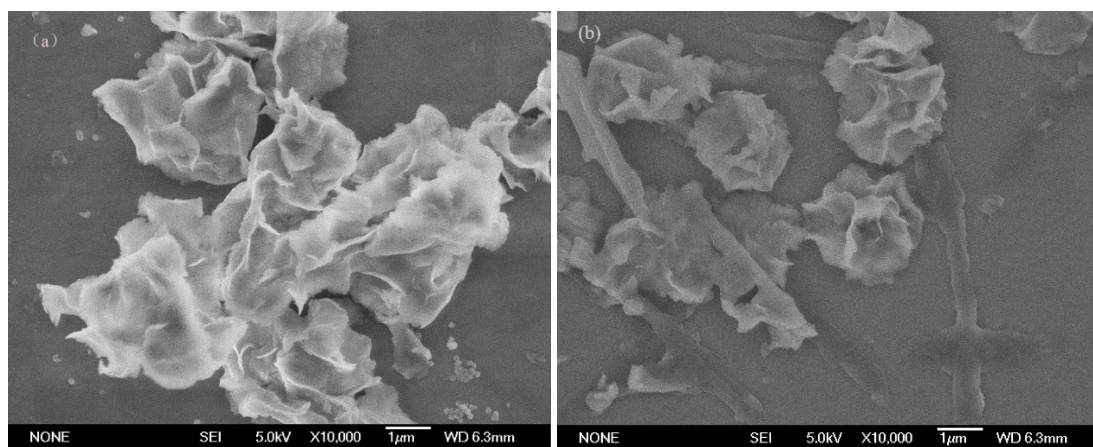

**Fig. S1** SEM images of the formation progress of tfdB-JLU-hNFs. Samples were prepared under 1 mg/mL enzyme concentration and 200 mM  $\text{Cu}^{2+}$  concentration at 25°C in PBS buffers (5 mM, pH=7.5) after 24h (Fig. S1a) and 72h (Fig. S1b).

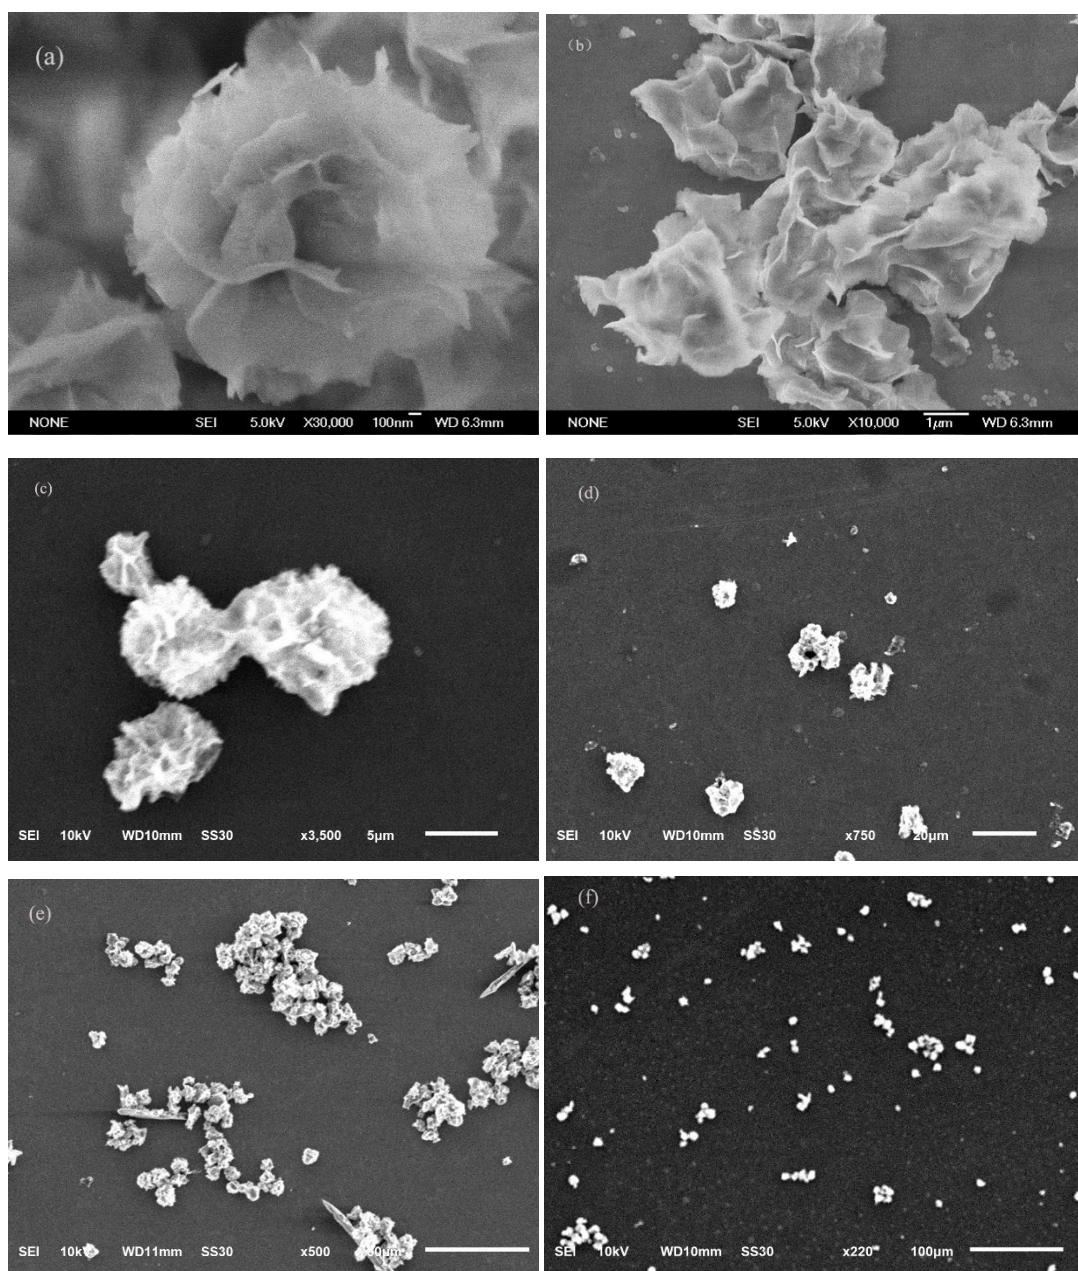

**Fig. S2** SEM images of tfdB-JLU-hNFs were prepared under 1 mg/mL enzyme concentration and 200 mM  $\text{Cu}^{2+}$  concentration at 25°C in PBS buffers (5 mM, pH=7.5) in various resolutions: (a) 100 nm; (b) 1 μm; (c) 5 μm; (d) 20 μm; (e) 50 μm; (f) 100 μm.
